# Supplementary material for: Transcriptional Profiling Reveals Differential Gene Expression of Amur Ide (Leuciscus waleckii) during Spawning Migration
Source: PubMed Central journal article supplement (PMC4490533; doi:10.3390/ijms160613959), 2015-06-18
Supplement: ijms-16-13959-s001.pdf [file ijms-16-13959-s001.pdf]

## Supplementary Information

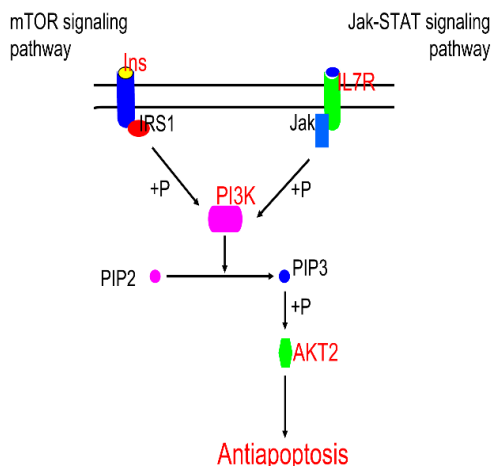

**Figure S1.** Diagram of putative PI3K–AKT network during Amur ide spawning migration. The *PI3K* and *AKT2* genes involved in the PI3K–AKT network and their expressions were up-regulated in SM, indicating that the PI3K–AKT is a strong candidate for apoptosis regulation and plays the critical roles on inhibition of apoptosis because of change of osmotic pressure during Amur ide spawning migration.

**Table S1.** Differential expressed genes identified by transcriptome comparison.

| Gene ID        | RSEM (FW) | RSEM (SM) | Fold Change | p-Value  | Gene Name                                                        |
|----------------|-----------|-----------|-------------|----------|------------------------------------------------------------------|
| comp99124_c0   | 56.67     | 0         | 37.78900814 | 3.65E-26 | adrenomedullin 2a precursor                                      |
| comp102945_c4  | 19.5      | 0         | 37.10132625 | 4.23E-24 | PREDICTED: hypothetical protein LOC100333395                     |
| comp102927_c7  | 12.6      | 0         | 35.03081174 | 6.28E-18 | Cideb protein                                                    |
| comp102325_c0  | 15.21     | 0         | 34.77221764 | 3.60E-17 | MHC class II antigen                                             |
| comp102117_c5  | 16.92     | 0         | 34.5338489  | 1.80E-16 | starmaker                                                        |
| comp102025_c11 | 4.33      | 0         | 34.02053679 | 5.72E-15 | ATP-dependent RNA helicase DDX54                                 |
| comp102514_c3  | 3.68      | 0         | 33.96960035 | 7.93E-15 | ubiquitin carboxyl-terminal hydrolase 16                         |
| comp102751_c15 | 9.11      | 0         | 33.79345644 | 2.61E-14 | PREDICTED: hypothetical protein LOC566559 isoform 1              |
| comp102456_c1  | 13.07     | 0         | 33.5835665  | 1.05E-13 | PREDICTED: urokinase plasminogen activator surface receptor-like |
| comp102333_c8  | 7.1       | 0         | 33.41925976 | 3.08E-13 | PREDICTED: GTPase IMAP family member 2-like                      |
| comp99484_c0   | 10.41     | 0         | 33.3858929  | 3.85E-13 | PREDICTED: mpv17-like protein-like                               |
| comp100385_c0  | 3.87      | 0         | 33.28605528 | 7.18E-13 | Thymidine phosphorylase                                          |
| comp102998_c8  | 1         | 0         | 33.09450008 | 2.47E-12 | PREDICTED: hypothetical protein LOC100537129                     |
| comp99539_c0   | 4.1       | 0         | 33.04307155 | 3.57E-12 | glia maturation factor beta                                      |
| comp102831_c4  | 15        | 0         | 32.71952708 | 2.72E-11 | complement C3-H1                                                 |
| comp102845_c1  | 9.86      | 0         | 32.64407485 | 4.36E-11 | uncharacterized protein LOC100006475 precursor                   |
| comp102924_c1  | 3.75      | 0         | 32.60690333 | 5.56E-11 | PREDICTED: uncharacterized protein LOC100889275                  |
| comp102762_c2  | 1.39      | 0         | 32.34317329 | 2.99E-10 | influenza virus NS1A-binding protein homolog B                   |
| comp100080_c1  | 1.27      | 0         | 32.1678557  | 8.83E-10 | Zinc finger CCCH-type containing 14                              |
| comp102296_c3  | 4.36      | 0         | 32.13915184 | 1.04E-09 | Uncharacterized protein                                          |
| comp102351_c2  | 0.94      | 0         | 32.1288099  | 1.13E-09 | PREDICTED: hypothetical protein LOC100537969                     |
| comp101989_c4  | 2.94      | 0         | 32.12229096 | 1.13E-09 | BET1 homolog                                                     |
| comp101544_c1  | 3.86      | 0         | 31.94454258 | 3.26E-09 | CD2 family receptor                                              |
| comp102812_c4  | 6.25      | 0         | 31.8665226  | 5.26E-09 | Uncharacterized protein                                          |

Table S1. *Cont.*

| Gene ID        | RSEM (FW) | RSEM (SM) | Fold Change | p-Value  | Gene Name                                                                 |
|----------------|-----------|-----------|-------------|----------|---------------------------------------------------------------------------|
| comp100941_c2  | 1.68      | 0         | 31.8415772  | 5.80E-09 | PREDICTED: magnesium transporter MRS2 homolog, mitochondrial-like         |
| comp100775_c0  | 1.84      | 0         | 31.81292361 | 7.08E-09 | Family with sequence similarity 82, member A2                             |
| comp102365_c3  | 4.67      | 0         | 31.78245833 | 8.67E-09 | polyprotein                                                               |
| comp102497_c3  | 5.09      | 0         | 31.77558036 | 8.67E-09 | PREDICTED: hypothetical protein LOC100007935                              |
| comp101653_c0  | 1.22      | 0         | 31.6826713  | 1.47E-08 | complement C1q tumor necrosis factor-related protein 1 precursor          |
| comp102571_c24 | 1.31      | 0         | 31.67795012 | 1.64E-08 | PREDICTED: protein FAM20A-like, partial                                   |
| comp100076_c7  | 2.35      | 0         | 31.6010296  | 2.56E-08 | Ighmbp2l protein                                                          |
| comp102770_c0  | 0.84      | 0         | 31.51893121 | 4.09E-08 | PREDICTED: hypothetical protein LOC100538314                              |
| comp100952_c3  | 3.64      | 0         | 31.49099552 | 4.62E-08 | PREDICTED: desmoglein-4-like                                              |
| comp102578_c7  | 3.22      | 0         | 31.47082977 | 5.22E-08 | PREDICTED: complement C3                                                  |
| comp102753_c2  | 0.43      | 0         | 31.45126377 | 5.90E-08 | Ugdh protein                                                              |
| comp101848_c2  | 0.71      | 0         | 31.31437987 | 1.28E-07 | PREDICTED: transmembrane protein 56-B                                     |
| comp102866_c10 | 0.87      | 0         | 31.23303391 | 1.94E-07 | S-adenosylmethionine synthetase isoform type-2                            |
| comp102134_c8  | 1.6       | 0         | 30.99688645 | 7.45E-07 | pyrroline-5-carboxylate reductase                                         |
| comp101696_c1  | 1.35      | 0         | 30.81859709 | 1.72E-06 | ribonuclease P protein subunit p14                                        |
| comp102333_c9  | 3.61      | 0         | 30.81722375 | 1.72E-06 | uncharacterized protein LOC406638                                         |
| comp102898_c4  | 0.56      | 0         | 30.80133564 | 2.05E-06 | DNA replication licensing factor MCM5                                     |
| comp100708_c0  | 1.41      | 0         | 30.77540357 | 2.05E-06 | dnaJ homolog subfamily C member 15                                        |
| comp101267_c0  | 0.98      | 0         | 30.66063339 | 4.28E-06 | thymidine kinase 2, mitochondrial                                         |
| comp101889_c0  | 1.02      | 0         | 30.61828384 | 5.19E-06 | AN1-type zinc finger protein 2B                                           |
| comp102564_c2  | 0.5       | 0         | 30.60918662 | 5.19E-06 | signal transducer and activator of transcription 6, interleukin-4 induced |
| comp88163_c0   | 3.08      | 0         | 30.59483133 | 5.19E-06 | PREDICTED: hypothetical protein LOC100704550                              |
| comp102369_c3  | 1.72      | 0         | 30.56650261 | 6.32E-06 | PREDICTED: TGF-beta receptor type-2-like                                  |
| comp102539_c4  | 2.63      | 0         | 30.47061139 | 9.48E-06 | PREDICTED: hypothetical protein LOC560673                                 |
| comp102365_c2  | 2.54      | 0         | 30.37910264 | 1.45E-05 | protease/polymerase                                                       |
| comp102110_c2  | 0.3       | 0         | 30.32069364 | 2.25E-05 | p110                                                                      |
| comp95792_c0   | 2.67      | 0         | 30.28288732 | 2.25E-05 | PREDICTED: hypothetical protein LOC100537242                              |
| comp102093_c0  | 0.52      | 0         | 30.25272535 | 2.82E-05 | uncharacterized protein LOC368688                                         |
| comp102630_c4  | 1.69      | 0         | 30.24559589 | 2.82E-05 | PREDICTED: hypothetical protein LOC100334801                              |
| comp101797_c2  | 1.77      | 0         | 30.23226125 | 2.82E-05 | PREDICTED: hypothetical protein LOC569383                                 |
| comp102615_c8  | 0.39      | 0         | 30.17014366 | 4.53E-05 | midnolin                                                                  |
| comp68714_c0   | 3.61      | 0         | 30.12534605 | 4.53E-05 | polymerase                                                                |
| comp95550_c0   | 2.66      | 0         | 30.12534605 | 4.53E-05 | predicted protein                                                         |
| comp102528_c7  | 0.4       | 0         | 30.09052649 | 5.79E-05 | PREDICTED: collagen alpha-1(XIII) chain                                   |
| comp93184_c0   | 2.26      | 0         | 30.00986883 | 7.45E-05 | PREDICTED: serine incorporator 3-like                                     |
| comp93876_c0   | 2.9       | 0         | 29.94846828 | 9.64E-05 | PREDICTED: hypothetical protein LOC100493142                              |
| comp102994_c7  | 0.97      | 0         | 29.91932194 | 1.26E-04 | PREDICTED: protein NLRC3-like                                             |
| comp102214_c4  | 2.16      | 0         | 29.89022784 | 1.26E-04 | PREDICTED: alpha-2-macroglobulin                                          |
| comp93215_c1   | 2.38      | 0         | 29.88433795 | 1.26E-04 | pol-like protein ENS-3                                                    |
| comp101788_c18 | 0.25      | 0         | 29.8457929  | 1.65E-04 | glycoprotein A repetitions predominant precursor                          |
| comp100654_c2  | 1.1       | 0         | 29.82749209 | 1.65E-04 | TPA_exp: putative tyrosine recombinase                                    |
| comp102365_c1  | 2.27      | 0         | 29.67283384 | 2.91E-04 | gag-pol polyprotein                                                       |
| comp98009_c3   | 2.48      | 0         | 29.67283384 | 2.91E-04 | PREDICTED: hypothetical protein LOC100695311                              |
| comp102646_c3  | 0.19      | 0         | 29.67207433 | 2.91E-04 | Lipin 1                                                                   |
| comp102073_c1  | 0.14      | 0         | 29.63045524 | 3.91E-04 | Si:dkey-102f14.5                                                          |

Table S1. *Cont.*

| Gene ID       | RSEM (FW) | RSEM (SM) | Fold Change | p-Value  | Gene Name                                                                  |
|---------------|-----------|-----------|-------------|----------|----------------------------------------------------------------------------|
| comp102572_c6 | 3.36      | 0         | 29.59483133 | 3.91E-04 | complement C3-S                                                            |
| comp99185_c2  | 2.55      | 0         | 29.59483133 | 3.91E-04 | PREDICTED: hypothetical protein LOC100120441                               |
| comp90720_c0  | 1.78      | 0         | 29.42490633 | 7.27E-04 | PREDICTED: tumor necrosis factor receptor superfamily member 11B           |
| comp102296_c4 | 2.38      | 0         | 29.33179692 | 1.01E-03 | PREDICTED: immunoglobulin superfamily member 3-like                        |
| comp102842_c9 | 1.91      | 0         | 29.33179692 | 1.01E-03 | PREDICTED: retrotransposable element Tf2 155 kDa protein type 1-like       |
| comp102826_c0 | 1.16      | 0         | 29.20206299 | 2.00E-03 | uncharacterized protein LOC550566                                          |
| comp100349_c1 | 2.56      | 0         | 29.12534605 | 2.00E-03 | Uncharacterized protein                                                    |
| comp102333_c6 | 1.93      | 0         | 29.12534605 | 2.00E-03 | PREDICTED: GTPase IMAP family member 8-like                                |
| comp68714_c1  | 2.01      | 0         | 29.12534605 | 2.00E-03 | gag-pol polyprotein                                                        |
| comp91271_c0  | 1.76      | 0         | 29.12534605 | 2.00E-03 | PREDICTED: RETRansposon-like family member (retr-1)-like                   |
| comp102672_c4 | 0.13      | 0         | 29.0594996  | 2.86E-03 | unnamed protein product                                                    |
| comp101324_c1 | 0.12      | 0         | 29.04196967 | 2.86E-03 | serine/threonine-protein kinase SIK1                                       |
| comp87594_c1  | 1.57      | 0         | 29.00986883 | 2.86E-03 | PREDICTED: serine/threonine-protein kinase TAO3-like isoform 1             |
| comp91133_c0  | 1.91      | 0         | 29.00986883 | 2.86E-03 | PREDICTED: uncharacterized protein K02A2.6-like                            |
| comp99329_c2  | 1.85      | 0         | 29.00986883 | 2.86E-03 | PREDICTED: hypothetical protein LOC100536880                               |
| comp102761_c1 | 2.11      | 0         | 14.27128118 | 3.75E-12 | protein LSM14 homolog A                                                    |
| comp102185_c6 | 3.7       | 0         | 11.20599063 | 1.89E-12 | PREDICTED: SLIT-ROBO Rho GTPase-activating protein 3                       |
| comp102031_c0 | 152.36    | 0.27      | 9.134886633 | 1.03E-21 | ornithine decarboxylase 1a                                                 |
| comp102721_c6 | 0.3       | 0         | 8.663682495 | 2.45E-06 | PREDICTED: copper-transporting ATPase 2                                    |
| comp102791_c0 | 1.54      | 0         | 8.50670801  | 5.57E-12 | complement C4-1                                                            |
| comp102875_c2 | 19.83     | 0.08      | 7.870392595 | 3.41E-17 | PREDICTED: HHIP-like 1                                                     |
| comp67791_c0  | 13.08     | 0.07      | 7.571655518 | 4.65E-13 | PREDICTED: SAM domain and HD domain-containing protein 1-like              |
| comp102128_c0 | 0.65      | 0         | 7.525902929 | 1.45E-05 | tryptophanyl-tRNA synthetase, cytoplasmic                                  |
| comp103038_c1 | 5.18      | 0.03      | 7.514501174 | 2.40E-12 | complement factor H-like 1 protein                                         |
| comp102343_c2 | 5.63      | 0.06      | 6.589244915 | 4.22E-13 | novel transglutaminase family protein                                      |
| comp102329_c0 | 0.66      | 0.01      | 6.546120426 | 6.32E-06 | PREDICTED: hypothetical protein LOC100701766                               |
| comp102608_c5 | 1.37      | 0.02      | 6.40138073  | 7.11E-08 | PREDICTED: very long-chain acyl-CoA synthetase isoform 1                   |
| comp103011_c3 | 10.38     | 0.14      | 6.230045058 | 3.30E-08 | Si:dkey-19a16.11                                                           |
| comp102949_c3 | 0.98      | 0.02      | 5.963676365 | 5.30E-08 | PREDICTED: hypothetical protein LOC100008302                               |
| comp102612_c3 | 1.91      | 0.03      | 5.916709147 | 7.19E-10 | PREDICTED: solute carrier organic anion transporter family member 1C1-like |
| comp101330_c3 | 17.22     | 0.33      | 5.691247748 | 2.33E-11 | short chain dehydrogenase/reductase family 16C, member 5b                  |
| comp102986_c4 | 0.59      | 0.01      | 5.647870838 | 8.44E-05 | cytochrome P450, family 2, subfamily P, polypeptide 9                      |
| comp102860_c0 | 1.38      | 0.04      | 5.049164533 | 5.82E-07 | interleukin 13 receptor, alpha 1 precursor                                 |
| comp102750_c4 | 33.55     | 1.03      | 5.026203033 | 3.25E-10 | PREDICTED: hypothetical protein LOC100334998                               |
| comp54337_c0  | 2.53      | 0.1       | 4.605871234 | 4.88E-04 | hypothetical protein BRAFLDRAFT_201218                                     |
| comp93506_c1  | 2.13      | 0.1       | 4.342836828 | 1.33E-03 | PREDICTED: retrovirus polyprotein, putative-like                           |
| comp102203_c0 | 4.56      | 0.23      | 4.300823326 | 2.79E-06 | PREDICTED: hypothetical protein LOC100690401                               |
| comp102753_c9 | 0.48      | 0.03      | 4.165792527 | 1.33E-03 | PREDICTED: nuclear factor 1 X-type                                         |

Table S1. *Cont.*

| Gene ID        | RSEM<br>(FW) | RSEM<br>(SM) | Fold Change | <i>p</i> -Value | Gene Name                                                                                                        |
|----------------|--------------|--------------|-------------|-----------------|------------------------------------------------------------------------------------------------------------------|
| comp102036_c0  | 2.47         | 0.14         | 4.108371574 | 3.04E-03        | PREDICTED: hypothetical protein LOC100710874                                                                     |
| comp95589_c1   | 2.49         | 0.14         | 4.108371574 | 3.04E-03        | PREDICTED: ADM2                                                                                                  |
| comp96263_c2   | 2.16         | 0.13         | 4.108371574 | 3.04E-03        | PREDICTED: zinc finger protein 40                                                                                |
| comp103139_c0  | 1137.15      | 68.06        | 4.062422971 | 3.93E-08        | prostaglandin D2 synthase, brain precursor                                                                       |
| comp102388_c8  | 7.08         | 0.43         | 4.051935629 | 2.46E-07        | ankyrin repeat and protein kinase domain-containing protein 1                                                    |
| comp102817_c2  | 3.96         | 0.24         | 4.050835594 | 1.22E-05        | aig2-like domain-containing protein 1-b precursor                                                                |
| comp59020_c0   | 4.21         | 0.25         | 4.050656076 | 6.41E-05        | preprogalanin 2A                                                                                                 |
| comp99861_c1   | 5.16         | 0.31         | 4.043556638 | 5.42E-07        | pleckstrin homology domain containing, family G (with RhoGef domain) member 5a (plekhg5a), transcript variant X1 |
| comp98319_c0   | 20.39        | 1.3          | 3.968152679 | 3.31E-07        | novel protein similar to vertebrate mitochondrial ribosomal protein S14                                          |
| comp102181_c0  | 2.6          | 0.17         | 3.944240476 | 6.51E-06        | Palmdelphin b                                                                                                    |
| comp102842_c5  | 2.23         | 0.16         | 3.828263655 | 7.47E-04        | PREDICTED: retrotransposable element Tf2 155 kDa protein type 1-like                                             |
| comp102643_c6  | 4.03         | 0.29         | 3.796561338 | 1.40E-05        | reverse transcriptase                                                                                            |
| comp97269_c0   | 2.52         | 0.18         | 3.775796235 | 9.21E-04        | Neuropilin 2b                                                                                                    |
| comp102952_c8  | 2.78         | 0.22         | 3.664764923 | 1.42E-03        | PREDICTED: dnaJ homolog subfamily C member 16                                                                    |
| comp62047_c1   | 10.03        | 0.82         | 3.619677033 | 2.59E-06        | IFN-inducible and antiviral protein                                                                              |
| comp102842_c2  | 4.2          | 0.34         | 3.605871234 | 3.80E-05        | PREDICTED: retrotransposable element Tf2 155 kDa protein type 1-like                                             |
| comp102434_c7  | 0.89         | 0.07         | 3.600214508 | 8.98E-06        | testis-expressed sequence 2 protein                                                                              |
| comp102527_c0  | 1.2          | 0.1          | 3.585144068 | 6.51E-05        | growth hormone receptor b                                                                                        |
| comp100295_c0  | 2.69         | 0.23         | 3.565229249 | 5.72E-04        | unnamed protein product                                                                                          |
| comp101835_c0  | 1            | 0.09         | 3.552639785 | 1.10E-04        | PREDICTED: toll-like receptor 5-like                                                                             |
| comp93418_c0   | 3.28         | 0.28         | 3.539396284 | 1.96E-05        | YY1-associated factor 2                                                                                          |
| comp102476_c2  | 2.55         | 0.22         | 3.521710786 | 6.82E-04        | PREDICTED: transmembrane protein 80-like                                                                         |
| comp102279_c14 | 6.26         | 0.55         | 3.496879853 | 3.51E-06        | PREDICTED: protein phosphatase 1K, mitochondrial-like                                                            |
| comp94235_c1   | 1.85         | 0.17         | 3.480340352 | 2.81E-03        | PREDICTED: apolipoprotein B-100                                                                                  |
| comp102262_c14 | 94.14        | 8.6          | 3.452010406 | 1.73E-06        | apoptosis-inducing factor, mitochondrion-associated 2                                                            |
| comp102728_c3  | 7.29         | 0.67         | 3.445930321 | 6.77E-06        | PREDICTED: hypothetical protein LOC100004944                                                                     |
| comp102455_c10 | 4.38         | 0.42         | 3.394367128 | 1.16E-05        | PREDICTED: plectin-like                                                                                          |
| comp92134_c0   | 2.7          | 0.27         | 3.342836828 | 1.42E-03        | uncharacterized protein LOC768162                                                                                |
| comp70094_c0   | 5.78         | 0.58         | 3.316841619 | 1.33E-05        | PREDICTED: UMP-CMP kinase 2, mitochondrial, partial                                                              |
| comp70195_c1   | 6.91         | 0.7          | 3.293927227 | 9.91E-05        | interferon-inducible 58 kDa protein                                                                              |
| comp100295_c4  | 3.84         | 0.39         | 3.288644267 | 3.68E-05        | PREDICTED: saecin                                                                                                |
| comp54916_c0   | 3.92         | 0.41         | 3.268836246 | 8.51E-04        | Meiosis expressed gene 1 homolog                                                                                 |
| comp101897_c0  | 0.78         | 0.08         | 3.203998194 | 1.18E-03        | required for meiotic nuclear division protein 1 homolog                                                          |
| comp70117_c0   | 3.18         | 0.36         | 3.15019175  | 1.39E-03        | protein phosphatase 1 regulatory subunit 3D                                                                      |
| comp88493_c0   | 11.5         | 1.32         | 3.122446759 | 2.99E-05        | PREDICTED: hypothetical protein LOC794824                                                                        |
| comp102789_c0  | 3.53         | 0.41         | 3.110604345 | 2.85E-05        | relA-associated inhibitor                                                                                        |
| comp101244_c8  | 3.14         | 0.36         | 3.108371574 | 1.64E-03        | neuronal growth regulator 1 precursor                                                                            |
| comp102716_c3  | 5.17         | 0.61         | 3.073571692 | 3.81E-05        | PREDICTED: protein FAM151B-like                                                                                  |
| comp70195_c0   | 7.93         | 0.95         | 3.059043862 | 5.29E-05        | interferon-inducible protein IFI58                                                                               |

Table S1. *Cont.*

| Gene ID        | RSEM (FW) | RSEM (SM) | Fold Change | p-Value  | Gene Name                                                                                         |
|----------------|-----------|-----------|-------------|----------|---------------------------------------------------------------------------------------------------|
| comp59547_c0   | 9.01      | 1.09      | 3.054331734 | 3.41E-05 | IFN-regulatory factory 7                                                                          |
| comp102200_c2  | 9.08      | 1.1       | 3.038560751 | 2.20E-05 | PREDICTED: low-density lipoprotein receptor-related protein 1                                     |
| comp100925_c2  | 2.67      | 0.35      | 2.94240426  | 1.16E-04 | peroxisome proliferator-activated receptor delta b                                                |
| comp94818_c1   | 6.64      | 0.87      | 2.935576679 | 7.86E-05 | PREDICTED: hypothetical protein LOC100704369                                                      |
| comp102921_c0  | 3.65      | 0.49      | 2.897271329 | 1.08E-04 | UDP glucuronosyltransferase 5 family, polypeptide C1                                              |
| comp102450_c3  | 1.31      | 0.18      | 2.834712906 | 5.20E-04 | PREDICTED: inositol hexakisphosphate and diphosphoinositol-pentakisphosphate kinase 1-like        |
| comp100801_c4  | 3.41      | 0.48      | 2.828263655 | 1.43E-03 | Zgc:171445 protein                                                                                |
| comp99570_c0   | 1.85      | 0.27      | 2.790523239 | 6.79E-04 | 3'-5' exoribonuclease 1                                                                           |
| comp102423_c4  | 3.6       | 0.52      | 2.786443479 | 8.77E-04 | Si:dkey-95h12.1                                                                                   |
| comp102293_c8  | 1.76      | 0.26      | 2.782022898 | 5.03E-04 | PREDICTED: histone-lysine N-methyltransferase MLL3                                                |
| comp97178_c3   | 5.03      | 0.74      | 2.765069829 | 3.51E-04 | PREDICTED: peroxisomal proliferator-activated receptor A-interacting complex 285 kDa protein-like |
| comp99682_c0   | 7.94      | 1.19      | 2.73240364  | 4.10E-04 | Si:dkey-60b12.4                                                                                   |
| comp100307_c2  | 3.11      | 0.48      | 2.693334075 | 1.95E-03 | Myxovirus (influenza) resistance A                                                                |
| comp102642_c0  | 6.26      | 1         | 2.651760005 | 3.85E-04 | Fibroblast growth factor receptor substrate 2a                                                    |
| comp102792_c7  | 0.78      | 0.12      | 2.644295994 | 1.42E-03 | formimidoyltransferase-cyclodeaminase                                                             |
| comp101642_c3  | 6.84      | 1.11      | 2.619902023 | 3.92E-04 | folliculin-interacting protein 2                                                                  |
| comp100801_c1  | 3.49      | 0.57      | 2.605871234 | 2.79E-03 | alpha-2-macroglobulin-like precursor                                                              |
| comp102641_c3  | 3.16      | 0.53      | 2.579052117 | 7.44E-04 | thyroid transcription factor 1-associated protein 26 homolog                                      |
| comp102984_c4  | 2.86      | 0.48      | 2.578904186 | 2.55E-03 | tetratricopeptide repeat protein 12                                                               |
| comp69638_c0   | 4.28      | 0.72      | 2.573449756 | 1.22E-03 | Cytokine inducible SH2-containing protein b                                                       |
| comp99986_c0   | 12.58     | 2.17      | 2.533978315 | 3.62E-04 | PREDICTED: hypothetical protein LOC100332522                                                      |
| comp101958_c11 | 2.74      | 0.48      | 2.516001329 | 7.40E-04 | stromal membrane-associated protein 1                                                             |
| comp102423_c1  | 2.71      | 0.48      | 2.492214452 | 2.66E-03 | PREDICTED: hypothetical protein LOC100702146                                                      |
| comp102794_c4  | 6.18      | 1.1       | 2.489761023 | 9.66E-04 | Si:ch211-182e10.4                                                                                 |
| comp101584_c0  | 7.63      | 1.38      | 2.461854403 | 6.15E-04 | probable ribosome biogenesis protein NEP1                                                         |
| comp95531_c0   | 1.69      | 0.31      | 2.456224697 | 2.56E-03 | enolase superfamily 1                                                                             |
| comp100778_c2  | 7.65      | 1.41      | 2.43855899  | 6.23E-04 | PREDICTED: uncharacterized protein C6orf150-like                                                  |
| comp89409_c2   | 6.49      | 1.2       | 2.435946232 | 2.97E-03 | E3 ubiquitin-protein ligase parkin                                                                |
| comp102504_c1  | 7.76      | 1.44      | 2.424652053 | 5.91E-04 | uncharacterized protein LOC692330                                                                 |
| comp100578_c1  | 7.81      | 1.46      | 2.421908399 | 6.26E-04 | PREDICTED: probable G-protein coupled receptor-like                                               |
| comp99726_c0   | 2.9       | 0.54      | 2.418950984 | 1.19E-03 | PREDICTED: protein FAM83C-like                                                                    |
| comp100876_c14 | 10.48     | 1.97      | 2.411192795 | 7.86E-04 | PREDICTED: hypothetical protein LOC100707133                                                      |
| comp88384_c0   | 2.87      | 0.54      | 2.400997934 | 1.92E-03 | Replication factor C (activator 1) 3                                                              |
| comp89473_c0   | 4.71      | 0.9       | 2.394367128 | 1.76E-03 | Transmembrane protein 170A                                                                        |
| comp102423_c3  | 4.28      | 0.81      | 2.393462901 | 1.43E-03 | PREDICTED: hypothetical protein LOC100703585                                                      |
| comp100309_c0  | 5.05      | 0.96      | 2.39216454  | 1.70E-03 | Rhesus blood group, C glycoprotein a                                                              |
| comp100390_c1  | 3.22      | 0.1       | 2.39216454  | 1.70E-03 | LysM, putative peptidoglycan-binding, domain containing 1                                         |
| comp97714_c1   | 4.14      | 0.79      | 2.380804678 | 2.81E-03 | Sox9a protein                                                                                     |
| comp102725_c1  | 4.37      | 0.86      | 2.352041382 | 1.35E-03 | PREDICTED: hypothetical protein LOC100005456                                                      |
| comp102181_c5  | 5.15      | 1.02      | 2.334066618 | 1.65E-03 | Uncharacterized protein                                                                           |
| comp102087_c6  | 2.39      | 0.5       | 2.253017148 | 1.68E-03 | suppressor of cytokine signaling 3b                                                               |

Table S1. *Cont.*

| Gene ID        | RSEM<br>(FW) | RSEM<br>(SM) | Fold Change  | p-Value  | Gene Name                                                         |
|----------------|--------------|--------------|--------------|----------|-------------------------------------------------------------------|
| comp102600_c16 | 4.19         | 0.89         | 2.24035387   | 2.40E-03 | PREDICTED: protein jagged-2-like                                  |
| comp102818_c3  | 6.69         | 1.44         | 2.211343688  | 1.49E-03 | conserved hypothetical protein                                    |
| comp101730_c0  | 1.74         | 0.38         | 2.207041996  | 2.99E-03 | nuclear factor, interleukin 3 regulated, member 6                 |
| comp102454_c1  | 2.54         | 0.55         | 2.194850964  | 2.41E-03 | ovarian TNF receptor                                              |
| comp102149_c0  | 1753.31      | 384.13       | 2.190412697  | 1.32E-03 | PREDICTED: hypothetical protein LOC556125                         |
| comp69987_c0   | 6.11         | 1.35         | 2.182719163  | 2.56E-03 | tether containing UBX domain for GLUT4                            |
| comp103013_c11 | 10.8         | 2.42         | 2.15545804   | 1.77E-03 | Myeloid cell leukemia sequence 1b                                 |
| comp102484_c6  | 5.73         | 1.29         | 2.153057175  | 2.37E-03 | cholesteryl ester transfer protein precursor                      |
| comp101798_c0  | 22.53        | 5.14         | 2.133004444  | 1.85E-03 | hydroxymethylglutaryl-CoA synthase, cytoplasmic                   |
| comp101939_c4  | 169.91       | 40.48        | 2.069303681  | 2.32E-03 | Ceruloplasmin                                                     |
| comp69666_c0   | 308.35       | 75.27        | 2.034382341  | 2.72E-03 | Sepp1a protein                                                    |
| comp103171_c0  | 195.29       | 796          | -2.027156846 | 2.81E-03 | novel elastase protein (zgc:637440)                               |
| comp68911_c0   | 765.1        | 3125.68      | -2.030452641 | 2.76E-03 | Try protein                                                       |
| comp103180_c0  | 163.6        | 671.79       | -2.037874358 | 2.69E-03 | PREDICTED: syncollin-like                                         |
| comp102210_c0  | 500.1        | 2087.51      | -2.061493791 | 2.40E-03 | pancreatic elastase precursor                                     |
| comp62899_c0   | 174.73       | 753.77       | -2.109004544 | 1.94E-03 | six-cysteine containing astacin protease 3 precursor              |
| comp61984_c0   | 1.63         | 7.04         | -2.113256505 | 2.80E-03 | Uncharacterized protein                                           |
| comp71713_c0   | 12.89        | 56.21        | -2.124195595 | 1.87E-03 | glucokinase                                                       |
| comp115558_c0  | 2.87         | 12.53        | -2.126989962 | 3.07E-03 | fep15 selenoprotein precursor                                     |
| comp102032_c6  | 1.09         | 4.79         | -2.136963066 | 2.19E-03 | PREDICTED: c-Jun-amino-terminal kinase-interacting protein 4-like |
| comp102458_c14 | 6.85         | 30.38        | -2.149483538 | 1.76E-03 | steroid hormone receptor ERR1                                     |
| comp102451_c3  | 6.6          | 29.44        | -2.156706265 | 1.64E-03 | putative hexokinase HKDC1                                         |
| comp62088_c0   | 10.95        | 48.83        | -2.15730424  | 1.90E-03 | PREDICTED: elastase inhibitor-like                                |
| comp100340_c0  | 4.94         | 22.06        | -2.158703255 | 1.77E-03 | squalene synthase                                                 |
| comp103030_c2  | 0.79         | 3.55         | -2.165308674 | 2.09E-03 | HEAT repeat-containing protein 1                                  |
| comp102715_c4  | 1.39         | 6.23         | -2.169065254 | 1.98E-03 | PREDICTED: im:7147678                                             |
| comp64707_c0   | 4.5          | 20.54        | -2.189875445 | 1.56E-03 | probable phosphatase phospho1                                     |
| comp102051_c0  | 8.66         | 40.14        | -2.212896955 | 1.30E-03 | glutathione S-transferase theta-like                              |
| comp100511_c0  | 18.78        | 87.63        | -2.222350104 | 1.21E-03 | poly(U)-specific endoribonuclease-A precursor                     |
| comp102431_c0  | 5.5          | 26.35        | -2.259400273 | 1.11E-03 | PREDICTED: hypothetical protein LOC557984                         |
| comp103680_c0  | 39.68        | 192.49       | -2.278226163 | 9.08E-04 | Si:dkey-14d8.7 protein                                            |
| comp102458_c8  | 3.97         | 19.3         | -2.280260802 | 1.36E-03 | estrogen-related receptor alpha                                   |
| comp101902_c0  | 6.28         | 30.99        | -2.30267668  | 9.04E-04 | DNase I                                                           |
| comp102936_c9  | 2.41         | 11.91        | -2.304175853 | 8.63E-04 | malic enzyme 1, NADP(+)-dependent, cytosolic                      |
| comp102546_c1  | 0.43         | 2.14         | -2.311099788 | 1.55E-03 | Interleukin enhancer binding factor 3b                            |
| comp71193_c0   | 0.81         | 4.06         | -2.322499089 | 1.35E-03 | protein phosphatase 1 regulatory subunit 3B                       |
| comp100850_c0  | 351.26       | 1763.83      | -2.328081045 | 6.85E-04 | chymotrypsin B1 precursor                                         |
| comp103032_c0  | 0.97         | 4.89         | -2.332728222 | 2.51E-03 | PREDICTED: EMILIN-3                                               |
| comp100683_c0  | 0.26         | 1.33         | -2.346273655 | 2.47E-03 | cysteinyl-tRNA synthetase, cytoplasmic                            |
| comp102908_c10 | 1.01         | 5.19         | -2.361560904 | 3.02E-03 | Si:dkeyp-2c8.3                                                    |

Table S1. *Cont.*

| Gene ID        | RSEM<br>(FW) | RSEM<br>(SM) | Fold Change  | p-Value  | Gene Name                                                                         |
|----------------|--------------|--------------|--------------|----------|-----------------------------------------------------------------------------------|
| comp102905_c13 | 2.48         | 12.78        | -2.36442847  | 7.85E-04 | mitochondrial 39S ribosomal protein l16                                           |
| comp102530_c7  | 4.94         | 25.53        | -2.371096909 | 6.38E-04 | heparin cofactor 2 precursor                                                      |
| comp97270_c0   | 0.61         | 3.16         | -2.381189711 | 1.30E-03 | PREDICTED: hypothetical protein LOC100001663                                      |
| comp89363_c0   | 0.34         | 1.8          | -2.415246436 | 2.94E-03 | dehydrodolichyl diphosphate synthase                                              |
| comp102127_c8  | 0.75         | 4.11         | -2.446715728 | 1.43E-03 | novel protein similar to vertebrate COMM domain<br>containing 9 (COMMD9)          |
| comp102950_c1  | 0.47         | 2.59         | -2.449201757 | 7.86E-04 | Chloride channel 2                                                                |
| comp103123_c0  | 218.85       | 1200.42      | -2.455500558 | 3.65E-04 | Amylase, alpha 2A; pancreatic                                                     |
| comp101235_c1  | 62.8         | 345.94       | -2.461718237 | 3.53E-04 | PREDICTED: fatty acid synthase-like                                               |
| comp103032_c10 | 0.78         | 4.31         | -2.475517093 | 1.85E-03 | Elastin microfibril interfacier 3a                                                |
| comp97726_c1   | 1.23         | 6.88         | -2.486051256 | 1.20E-03 | Proteasome (prosome, macropain) subunit, beta type, 10                            |
| comp89158_c1   | 0.95         | 5.38         | -2.502653223 | 6.86E-04 | PREDICTED: calmegin-like                                                          |
| comp102176_c10 | 3.82         | 0            | -2.517647961 | 7.75E-04 | PREDICTED: hypothetical protein LOC100535924                                      |
| comp101289_c0  | 0.28         | 1.59         | -2.521283793 | 1.31E-03 | interleukin 7 receptor precursor                                                  |
| comp66504_c0   | 0.89         | 5.13         | -2.523411783 | 1.88E-03 | PREDICTED: microfibril-associated glycoprotein 4-like                             |
| comp103534_c0  | 49.79        | 289.66       | -2.54028155  | 2.44E-04 | chymotrypsin-like precursor                                                       |
| comp88432_c0   | 1.54         | 9.21         | -2.576653805 | 4.17E-04 | Fgf19 protein                                                                     |
| comp102964_c0  | 2.19         | 13.19        | -2.587761059 | 2.38E-04 | uncharacterized protein LOC553197                                                 |
| comp102615_c10 | 61.75        | 377.48       | -2.611993436 | 1.66E-04 | Cpb1 protein, partial                                                             |
| comp102803_c0  | 62.54        | 384.35       | -2.61967196  | 1.59E-04 | Cel.2 protein                                                                     |
| comp94017_c3   | 0.56         | 3.47         | -2.622947457 | 2.47E-03 | uncharacterized protein LOC393586                                                 |
| comp102620_c7  | 0.27         | 1.65         | -2.631568212 | 1.83E-03 | protein SSXT                                                                      |
| comp101599_c0  | 0.24         | 1.49         | -2.657404962 | 6.98E-04 | PREDICTED: dihydroxyacetone phosphate<br>acyltransferase-like                     |
| comp93327_c1   | 26.79        | 171.69       | -2.680027069 | 1.21E-04 | Hsp90a.2 protein                                                                  |
| comp100272_c0  | 0.44         | 2.84         | -2.691603817 | 5.21E-04 | PREDICTED: tyrosine-protein kinase BAZ1B                                          |
| comp100350_c0  | 0.63         | 4.12         | -2.719089046 | 2.83E-04 | protein phosphatase 1, regulatory (inhibitor) subunit 14Ab                        |
| comp93327_c0   | 34.06        | 224.4        | -2.7198656   | 9.86E-05 | heat shock protein 90, alpha (cytosolic), class A member 1,<br>tandem duplicate 2 |
| comp93706_c0   | 0.35         | 2.35         | -2.752897531 | 8.63E-04 | Transcription elongation factor, mitochondrial                                    |
| comp93536_c0   | 0.58         | 3.95         | -2.756698846 | 1.84E-03 | PREDICTED: hypothetical protein LOC100150934                                      |
| comp101238_c1  | 0.39         | 2.63         | -2.764894846 | 6.72E-04 | suppressor of G2 allele of SKP1 homolog                                           |
| comp101398_c0  | 0.44         | 3.15         | -2.827367831 | 2.22E-04 | PREDICTED: nucleotide exchange factor SIL1-like                                   |
| comp102173_c5  | 2.47         | 17.76        | -2.848157098 | 5.31E-05 | PREDICTED: nodal modulator 1                                                      |
| comp100723_c0  | 0.04         | 0.31         | -2.851233082 | 2.76E-03 | G/T mismatch-specific thymine DNA glycosylase                                     |
| comp93327_c2   | 5.29         | 39.98        | -2.919385021 | 7.45E-05 | PREDICTED: heat shock protein HSP 90-alpha-like                                   |
| comp101217_c0  | 0.68         | 5.19         | -2.923949713 | 1.37E-04 | PREDICTED: uncharacterized protein LOC575262                                      |
| comp100319_c0  | 0.28         | 2.14         | -2.925292273 | 2.25E-04 | PREDICTED: hypothetical protein LOC558212                                         |
| comp101669_c0  | 0.12         | 0.93         | -2.932418175 | 1.31E-03 | PREDICTED: e3 ubiquitin/ISG15 ligase TRIM25                                       |
| comp69063_c0   | 0.46         | 3.55         | -2.942565391 | 1.82E-03 | uncharacterized protein LOC793030 precursor                                       |
| comp101051_c0  | 0.69         | 5.42         | -2.973769627 | 1.32E-04 | ubiquitin C-terminal hydrolase L1                                                 |
| comp100438_c0  | 3.38         | 26.77        | -2.985973242 | 2.49E-05 | Ddx5 protein                                                                      |
| comp102982_c3  | 0.12         | 1.03         | -3.050368681 | 3.45E-04 | replication protein A 70 kDa DNA-binding subunit                                  |

Table S1. *Cont.*

| Gene ID        | RSEM (FW) | RSEM (SM) | Fold Change  | p-Value  | Gene Name                                                     |
|----------------|-----------|-----------|--------------|----------|---------------------------------------------------------------|
| comp69999_c1   | 0.38      | 3.15      | -3.054379394 | 4.97E-04 | polyadenylate-binding protein 4                               |
| comp102748_c0  | 1.97      | 17.5      | -3.15481999  | 1.19E-05 | DnaJ (Hsp40) homolog, subfamily B, member 1                   |
| comp102507_c0  | 0.46      | 4.1       | -3.162359597 | 1.91E-05 | ER degradation-enhancing alpha-mannosidase-like 1             |
| comp91343_c0   | 0.29      | 2.66      | -3.201483688 | 2.55E-03 | GTP binding protein 1, like                                   |
| comp102526_c5  | 0.68      | 6.3       | -3.211687468 | 2.25E-05 | guanylate binding protein 4                                   |
| comp89910_c0   | 1.34      | 13.12     | -3.286315718 | 1.05E-05 | mid1-interacting protein 1-like                               |
| comp103002_c6  | 0.42      | 4.11      | -3.301019362 | 2.31E-04 | PREDICTED: hypothetical protein LOC100498431                  |
| comp99919_c0   | 0.19      | 1.89      | -3.301019362 | 1.72E-03 | Zinc finger protein 503                                       |
| comp102119_c5  | 0.38      | 3.77      | -3.303455661 | 1.49E-05 | PREDICTED: plexin-C1                                          |
| comp102659_c8  | 0.66      | 6.67      | -3.347015692 | 1.18E-05 | PREDICTED: receptor-type tyrosine-protein phosphatase zeta    |
| comp102832_c7  | 25.17     | 257.08    | -3.352569943 | 2.82E-06 | PREDICTED: maltase-glucoamylase, intestinal                   |
| comp100688_c0  | 0.36      | 3.83      | -3.394128766 | 1.18E-03 | gamma-glutamyl cyclotransferase a                             |
| comp102786_c1  | 0.91      | 9.64      | -3.411500326 | 3.38E-06 | PREDICTED: lon protease homolog, mitochondrial                |
| comp102401_c0  | 0.3       | 3.35      | -3.462783801 | 6.81E-06 | PREDICTED: baculoviral IAP repeat-containing protein 6        |
| comp102538_c1  | 0.19      | 2.17      | -3.502653223 | 2.81E-03 | PREDICTED: phosphofurin acidic cluster sorting protein 2-like |
| comp93835_c1   | 0.23      | 2.56      | -3.502653223 | 8.70E-05 | conserved hypothetical protein                                |
| comp97468_c1   | 0.28      | 3.24      | -3.533680119 | 2.56E-04 | superoxide dismutase-like                                     |
| comp101358_c1  | 0.23      | 2.78      | -3.622947457 | 1.77E-03 | tripartite motif containing 35                                |
| comp99683_c0   | 0.2       | 2.5       | -3.644269245 | 2.28E-05 | cleavage and polyadenylation specificity factor subunit 6     |
| comp102656_c0  | 0.22      | 2.82      | -3.648951473 | 8.99E-06 | PREDICTED: hypothetical protein LOC100698500                  |
| comp60482_c0   | 0.23      | 3.17      | -3.786446189 | 9.21E-04 | IGF                                                           |
| comp89158_c0   | 0.4       | 5.6       | -3.792817277 | 2.45E-05 | Si:ch211-274f20.2                                             |
| comp102529_c8  | 1.33      | 18.57     | -3.80445941  | 4.26E-07 | trans-2,3-enoyl-CoA reductase                                 |
| comp115872_c0  | 0.99      | 14.84     | -3.907198349 | 3.32E-06 | metallothionein B-like                                        |
| comp101706_c1  | 0.28      | 4.36      | -3.964637478 | 4.73E-07 | protein NipSnap homolog 2                                     |
| comp102184_c1  | 3.91      | 61.24     | -3.969076109 | 8.08E-08 | PREDICTED: maltase-glucoamylase, intestinal-like              |
| comp102942_c7  | 0.15      | 2.59      | -4.112257718 | 2.61E-05 | PREDICTED: hypothetical protein LOC100692678                  |
| comp89027_c0   | 0.39      | 6.92      | -4.151318735 | 4.48E-08 | PREDICTED: uncharacterized protein LOC763830, partial         |
| comp98089_c0   | 6.06      | 112.25    | -4.21203887  | 2.32E-08 | apolipoprotein D-like precursor                               |
| comp92587_c0   | 0.1       | 1.82      | -4.22701878  | 2.29E-03 | Solute carrier family 28                                      |
| comp98365_c5   | 0.11      | 2.25      | -4.301019362 | 1.74E-03 | growth hormone receptor                                       |
| comp102403_c1  | 0.06      | 1.3       | -4.35459414  | 1.34E-05 | ELMO/CED-12 domain containing 2 precursor                     |
| comp70923_c2   | 0.14      | 2.83      | -4.37140869  | 1.33E-03 | PREDICTED: erythroid differentiation-related factor 1-like    |
| comp102628_c2  | 2.38      | 49.59     | -4.382899911 | 6.70E-09 | heat shock 70 kDa protein                                     |
| comp101759_c0  | 0.04      | 0.82      | -4.430485567 | 1.13E-04 | PREDICTED: probable ergosterol biosynthetic protein 28-like   |
| comp101274_c13 | 0.12      | 2.67      | -4.506120051 | 2.20E-05 | PREDICTED: hypothetical protein LOC560266                     |
| comp96421_c3   | 0.19      | 4.48      | -4.546775776 | 1.85E-07 | uncharacterized protein LOC567731 precursor                   |
| comp101181_c0  | 0.23      | 6.66      | -4.847549117 | 1.40E-09 | PREDICTED: vitellogenin                                       |



Table S1. *Cont.*

| Gene ID        | RSEM<br>(FW) | RSEM<br>(SM) | Fold Change  | p-Value  | Gene Name                                                                                |
|----------------|--------------|--------------|--------------|----------|------------------------------------------------------------------------------------------|
| comp83201_c0   | 0.34         | 10.07        | -4.885981863 | 1.04E-08 | Retinoic acid receptor responder protein 3                                               |
| comp94015_c0   | 0.12         | 4.28         | -5.188544633 | 9.85E-07 | PREDICTED: UHRF1-binding protein 1-like                                                  |
| comp93355_c3   | 0.07         | 2.59         | -5.264493486 | 2.69E-05 | unnamed protein product                                                                  |
| comp101279_c2  | 0.22         | 8.49         | -5.267673548 | 2.45E-10 | rho-related gtp-binding protein rhoc                                                     |
| comp100318_c1  | 0.05         | 2.26         | -5.438522886 | 1.14E-05 | myosin heavy chain                                                                       |
| comp101504_c1  | 0.03         | 1.67         | -5.740474884 | 5.79E-07 | SRF6-like                                                                                |
| comp69517_c0   | 0.59         | 31.7         | -5.752345744 | 2.92E-12 | aspartyl-tRNA synthetase, cytoplasmic                                                    |
| comp102814_c2  | 0.03         | 1.62         | -5.759816224 | 4.03E-07 | putative L-aspartate dehydrogenase                                                       |
| comp102544_c0  | 0.01         | 1.3          | -6.504942325 | 4.54E-07 | PREDICTED: phosphatidylinositol 3-kinase regulatory subunit alpha isoform 1              |
| comp101847_c9  | 0.19         | 21.71        | -6.861734316 | 3.85E-09 | Cytochrome P450, family 2, subfamily K, polypeptide 6                                    |
| comp102894_c4  | 0.08         | 10.92        | -7.025669634 | 9.43E-14 | PREDICTED: hypothetical protein LOC100710859                                             |
| comp99707_c1   | 0.15         | 20.31        | -7.087615724 | 9.61E-10 | hypothetical protein SERLA73DRAFT_67379                                                  |
| comp70577_c0   | 0.1          | 15.4         | -7.212710944 | 4.29E-12 | PREDICTED: hypothetical protein LOC100333953                                             |
| comp102199_c0  | 0.36         | 56.41        | -7.292632585 | 3.12E-16 | carboxypeptidase A precursor                                                             |
| comp101826_c2  | 0.02         | 3.35         | -7.696151222 | 9.81E-13 | serine/threonine-protein kinase Sgk1                                                     |
| comp102799_c4  | 0            | 0.96         | -11.03233839 | 1.65E-04 | zgc:123060 (ZFIN)                                                                        |
| comp102863_c0  | 0            | 2.03         | -13.08221512 | 1.12E-11 | BSD domain containing 1                                                                  |
| comp102301_c13 | 0            | 2.19         | -29.10443731 | 2.86E-03 | probable E3 ubiquitin-protein ligase MYCBP2                                              |
| comp56672_c0   | 0            | 1.93         | -29.10443731 | 2.86E-03 | dnaJ homolog subfamily C member 17                                                       |
| comp68552_c0   | 0            | 1.78         | -29.10443731 | 2.86E-03 | uncharacterized protein LOC563088                                                        |
| comp92255_c2   | 0            | 1.86         | -29.10443731 | 2.86E-03 | novel protein similar to vertebrate IMP (inosine monophosphate) dehydrogenase 1 (IMPDH1) |
| comp96783_c2   | 0            | 1.75         | -29.10443731 | 2.86E-03 | myosin light chain kinase 3                                                              |
| comp99266_c0   | 0            | 1.75         | -29.10443731 | 2.86E-03 | PREDICTED: early endosome antigen 1                                                      |
| comp101708_c0  | 0            | 0.41         | -29.11659337 | 2.00E-03 | solute carrier family 25 member 47-B                                                     |
| comp102975_c0  | 0            | 0.3          | -29.21032165 | 2.00E-03 | cysteine and histidine-rich domain-containing protein 1                                  |
| comp90049_c0   | 0            | 1.72         | -29.21135252 | 2.00E-03 | si:dkeyp-52c3.2                                                                          |
| comp95917_c1   | 0            | 1.71         | -29.21135252 | 2.00E-03 | PREDICTED: trinucleotide repeat-containing gene 6B protein                               |
| comp96313_c2   | 0            | 2.12         | -29.21135252 | 2.00E-03 | putative transcription factor COE1                                                       |
| comp101498_c2  | 0            | 0.74         | -29.32238383 | 1.01E-03 | uncharacterized protein LOC100037365                                                     |
| comp80071_c2   | 0            | 2.94         | -29.40399759 | 1.01E-03 | gamma-glutamylcyclotransferase precursor                                                 |
| comp102784_c0  | 0            | 0.99         | -29.44751709 | 7.27E-04 | Transposable element Tcb1 transposase                                                    |
| comp98627_c2   | 0            | 1.31         | -29.46922522 | 7.27E-04 | Zgc:110391 protein, partial                                                              |
| comp71302_c0   | 0            | 2.37         | -29.49146044 | 7.27E-04 | zgc:101901                                                                               |
| comp98392_c1   | 0            | 1.83         | -29.49146044 | 7.27E-04 | Zinc finger, BED-type containing 1                                                       |
| comp97430_c0   | 0            | 1.09         | -29.50497524 | 5.30E-04 | Salt-inducible kinase 2a                                                                 |
| comp100878_c0  | 0            | 0.73         | -29.54967505 | 5.30E-04 | PREDICTED: hypothetical protein LOC100693263                                             |
| comp96436_c0   | 0            | 2.39         | -29.57392226 | 5.30E-04 | ORF2-encoded protein                                                                     |
| comp98885_c2   | 0            | 1.62         | -29.5811181  | 5.30E-04 | PREDICTED: sorbin and SH3 domain-containing protein 2                                    |
| comp102854_c2  | 0            | 0.08         | -29.63050612 | 3.91E-04 | E3 ubiquitin-protein ligase HECTD1                                                       |
| comp101583_c0  | 0            | 0.89         | -29.63972465 | 3.91E-04 | PREDICTED: hypothetical protein LOC100697633                                             |

Table S1. *Cont.*

| Gene ID        | RSEM (FW) | RSEM (SM) | Fold Change  | p-Value  | Gene Name                                                                |
|----------------|-----------|-----------|--------------|----------|--------------------------------------------------------------------------|
| comp102412_c2  | 0         | 3.61      | -29.65192511 | 3.91E-04 | PREDICTED: microfibril-associated glycoprotein 4                         |
| comp56282_c0   | 0         | 2.26      | -29.65192511 | 3.91E-04 | invariant chain like protein 1                                           |
| comp93358_c0   | 0         | 1.8       | -29.65192511 | 3.91E-04 | probable alpha-ketoglutarate-dependent dioxygenase<br>ABH6               |
| comp102966_c5  | 0         | 0.25      | -29.67676733 | 2.91E-04 | RAC-alpha serine/threonine-protein kinase                                |
| comp102570_c4  | 0         | 0.39      | -29.7601414  | 2.18E-04 | isobutyryl-CoA dehydrogenase, mitochondrial                              |
| comp102114_c11 | 0         | 0.48      | -29.80521846 | 1.65E-04 | PREDICTED: cell death activator CIDE-A-like                              |
| comp98762_c1   | 0         | 1.37      | -29.83026235 | 1.65E-04 | Wilms tumor suppressor protein 1b                                        |
| comp89799_c0   | 0         | 1.05      | -29.93818373 | 9.64E-05 | transcription elongation factor B polypeptide 1                          |
| comp102835_c2  | 0         | 0.87      | -29.95551361 | 9.64E-05 | PREDICTED: band 4.1-like protein 2-like, partial                         |
| comp102865_c13 | 0         | 0.88      | -29.97446053 | 9.64E-05 | PREDICTED: centromere protein V                                          |
| comp91465_c0   | 0         | 3.39      | -29.9889601  | 9.64E-05 | zona pellucida glycoprotein 2.1                                          |
| comp97205_c0   | 0         | 2.55      | -29.9889601  | 9.64E-05 | PREDICTED: transposon TX1 uncharacterized 149 kDa<br>protein-like        |
| comp90899_c1   | 0         | 2.78      | -30.04785378 | 7.45E-05 | PREDICTED: hypothetical protein LOC568313                                |
| comp97112_c0   | 0         | 0.46      | -30.06335135 | 5.79E-05 | Aldehyde dehydrogenase 9 family, member A1b                              |
| comp102593_c7  | 0         | 3.9       | -30.10443731 | 5.79E-05 | hypothetical protein MYCTH_2071514                                       |
| comp98392_c0   | 0         | 2.37      | -30.1588851  | 4.53E-05 | PREDICTED: hypothetical protein LOC100700880                             |
| comp102406_c2  | 0         | 0.97      | -30.28076009 | 2.25E-05 | MAP7 domain-containing protein 1                                         |
| comp102473_c3  | 0         | 1.13      | -30.29005993 | 2.25E-05 | PREDICTED: wolframin                                                     |
| comp102583_c12 | 0         | 1.74      | -30.30220595 | 2.25E-05 | PREDICTED: leukocyte elastase inhibitor isoform 1                        |
| comp99076_c1   | 0         | 1.86      | -30.31088819 | 2.25E-05 | uncharacterized protein LOC791929                                        |
| comp99905_c1   | 0         | 2.96      | -30.31088819 | 2.25E-05 | PREDICTED: suppressor of tumorigenicity 14 protein<br>homolog            |
| comp93835_c2   | 0         | 2.98      | -30.3581939  | 1.80E-05 | PREDICTED: uncharacterized protein LOC100890688                          |
| comp89898_c0   | 0         | 1.09      | -30.3931366  | 1.45E-05 | PREDICTED: hypothetical protein LOC100534830                             |
| comp103011_c7  | 0         | 2.82      | -30.40399759 | 1.45E-05 | PREDICTED: hypothetical protein LOC553357                                |
| comp95528_c0   | 0         | 2.95      | -30.40399759 | 1.45E-05 | MHC class II invariant chain Ii                                          |
| comp101618_c7  | 0         | 0.41      | -30.43035504 | 1.17E-05 | oxysterol binding protein-like 3a                                        |
| comp92178_c1   | 0         | 1.28      | -30.50623579 | 7.72E-06 | integrator complex subunit 10                                            |
| comp102522_c0  | 0         | 0.7       | -30.56023239 | 6.32E-06 | uncharacterized protein LOC100141491 precursor                           |
| comp102274_c0  | 0         | 0.44      | -30.56346532 | 6.32E-06 | PREDICTED: protein FAM13A isoform 1                                      |
| comp102156_c16 | 0         | 1.63      | -30.58271224 | 6.32E-06 | PREDICTED: oxysterol-binding protein-related protein<br>10-like, partial |
| comp102014_c2  | 0         | 0.3       | -30.5957971  | 5.19E-06 | protein transport protein Sec24C                                         |
| comp102006_c3  | 0         | 3.44      | -30.59658632 | 5.19E-06 | PREDICTED: hypothetical protein LOC100332181                             |
| comp99707_c0   | 0         | 7.65      | -30.79631502 | 2.05E-06 | Zgc:158463                                                               |
| comp101827_c2  | 0         | 0.59      | -30.80794696 | 1.72E-06 | Eukaryotic translation initiation factor 5                               |
| comp100128_c4  | 0         | 0.74      | -30.84627763 | 1.45E-06 | fat storage-inducing transmembrane protein 2                             |
| comp97699_c1   | 0         | 3.06      | -30.86342921 | 1.45E-06 | Zgc:174680                                                               |
| comp102379_c11 | 0         | 0.93      | -30.88264589 | 1.22E-06 | Tryptophan 2,3-dioxygenase a                                             |
| comp99142_c1   | 0         | 0.88      | -30.88974642 | 1.22E-06 | NEDD8                                                                    |
| comp60157_c0   | 0         | 3.5       | -30.89585069 | 1.22E-06 | uncharacterized protein LOC100327252 precursor                           |

Table S1. *Cont.*

| Gene ID        | RSEM (FW) | RSEM (SM) | Fold Change  | p-Value  | Gene Name                                                                |
|----------------|-----------|-----------|--------------|----------|--------------------------------------------------------------------------|
| comp102058_c22 | 0         | 1.12      | -30.96562922 | 8.76E-07 | PREDICTED: ribosomal protein S6 kinase beta-1-like                       |
| comp102551_c5  | 0         | 0.68      | -30.98233254 | 7.45E-07 | predicted protein                                                        |
| comp96828_c2   | 0         | 2.49      | -31.04785378 | 5.43E-07 | PREDICTED: protein transport protein Sec31A                              |
| comp99967_c1   | 0         | 1.43      | -31.13382224 | 3.45E-07 | PREDICTED: pleckstrin homology domain-containing family G member 5       |
| comp102593_c18 | 0         | 8.46      | -31.1588851  | 2.97E-07 | hypothetical protein PABG_06807                                          |
| comp102492_c1  | 0         | 1.21      | -31.17983829 | 2.57E-07 | PREDICTED: collagen alpha-1(XII) chain-like                              |
| comp93355_c6   | 0         | 3.41      | -31.18535731 | 2.57E-07 | PREDICTED: LOW QUALITY PROTEIN: wu:f104e06                               |
| comp92949_c0   | 0         | 2.55      | -31.23688761 | 1.94E-07 | PREDICTED: hypothetical protein LOC100537292                             |
| comp101409_c1  | 0         | 2.02      | -31.57872358 | 2.87E-08 | DNA damage-inducible transcript 4 protein                                |
| comp102519_c6  | 0         | 1.73      | -31.63243151 | 2.04E-08 | PREDICTED: hypothetical protein LOC100538074                             |
| comp101021_c0  | 0         | 5.2       | -31.75396434 | 9.62E-09 | PREDICTED: urokinase plasminogen activator surface receptor-like         |
| comp88529_c1   | 0         | 2.22      | -31.75714442 | 9.62E-09 | gap junction beta-6 protein                                              |
| comp102665_c1  | 0         | 0.64      | -31.81525434 | 7.08E-09 | PREDICTED: protein cordon-bleu                                           |
| comp102794_c5  | 0         | 1.06      | -31.8563624  | 5.80E-09 | abhydrolase domain-containing protein 4                                  |
| comp89370_c0   | 0         | 4.99      | -31.86277329 | 5.26E-09 | UPF0542 protein C5orf43 homolog                                          |
| comp102887_c12 | 0         | 1.05      | -31.91669856 | 3.94E-09 | PREDICTED: heterogeneous nuclear ribonucleoprotein U-like protein 1-like |
| comp102620_c6  | 0         | 1.34      | -31.93272518 | 3.58E-09 | nucleolysin TIAR                                                         |
| comp101302_c0  | 0         | 13.32     | -32.01870744 | 2.07E-09 | cytochrome oxidase subunit I (mitochondrion)                             |
| comp102816_c11 | 0         | 1.63      | -32.06363678 | 1.59E-09 | Activated leukocyte cell adhesion molecule                               |
| comp100712_c0  | 0         | 2.99      | -32.11659337 | 1.13E-09 | protein IMPACT                                                           |
| comp102652_c1  | 0         | 1.45      | -32.1837826  | 7.51E-10 | mucolipin-2                                                              |
| comp100875_c0  | 0         | 1.45      | -32.30908369 | 3.47E-10 | CD2-associated protein                                                   |
| comp102883_c1  | 0         | 1.23      | -32.33556247 | 2.99E-10 | complement receptor-like protein precursor                               |
| comp102724_c0  | 0         | 1.13      | -32.3398109  | 2.99E-10 | PREDICTED: transcriptional repressor NF-X1-like                          |
| comp102106_c0  | 0         | 2.77      | -32.34381185 | 2.99E-10 | Rnu3ip2 protein                                                          |
| comp102866_c2  | 0         | 2.14      | -32.35259844 | 2.78E-10 | PREDICTED: ankyrin repeat and SAM domain-containing protein 1A-like      |
| comp102450_c7  | 0         | 1.79      | -32.3909773  | 2.24E-10 | 45 kDa calcium-binding protein precursor                                 |
| comp102566_c14 | 0         | 3.23      | -32.4246998  | 1.81E-10 | uncharacterized protein LOC559970                                        |
| comp101818_c1  | 0         | 1.45      | -32.46198932 | 1.38E-10 | uncharacterized protein LOC564531                                        |
| comp102593_c22 | 0         | 14.52     | -32.47008678 | 1.29E-10 | hypothetical protein AN5245.2                                            |
| comp96751_c0   | 0         | 1.26      | -32.49833924 | 1.13E-10 | PREDICTED: pantothenate kinase 4-like                                    |
| comp102462_c1  | 0         | 1.41      | -32.56548223 | 7.15E-11 | PREDICTED: protein sidekick-1                                            |
| comp126569_c0  | 0         | 6.74      | -32.62316611 | 5.23E-11 | ATP synthase F0 subunit 6 (mitochondrion)                                |
| comp102651_c0  | 0         | 3.18      | -32.66336425 | 3.86E-11 | PREDICTED: si:ch211-197g15.7                                             |
| comp101847_c3  | 0         | 20.27     | -32.82185011 | 1.47E-11 | uncharacterized protein LOC100170784                                     |
| comp98419_c0   | 0         | 6.87      | -32.82185011 | 1.47E-11 | cytochrome b                                                             |
| comp99666_c0   | 0         | 4.89      | -32.89504897 | 9.12E-12 | COP9 signalosome complex subunit 4                                       |
| comp89974_c0   | 0         | 7.01      | -32.9984715  | 4.76E-12 | ATPase, H <sup>+</sup> transporting, V1 subunit F                        |

Table S1. *Cont.*

| Gene ID        | RSEM<br>(FW) | RSEM<br>(SM) | Fold Change  | p-Value  | Gene Name                                               |
|----------------|--------------|--------------|--------------|----------|---------------------------------------------------------|
| comp101806_c1  | 0            | 4.16         | -33.00532269 | 4.54E-12 | PREDICTED: FAST kinase domain-containing protein 5-like |
| comp125637_c0  | 0            | 12.37        | -33.06220908 | 3.11E-12 | cytochrome oxidase subunit II                           |
| comp100614_c4  | 0            | 3.71         | -33.07217346 | 2.97E-12 | Protein tyrosine phosphatase, receptor type, C          |
| comp102940_c2  | 0            | 1.83         | -33.2955383  | 6.90E-13 | UHRF1-binding protein 1-like                            |
| comp102395_c1  | 0            | 5.76         | -33.31130891 | 6.12E-13 | PREDICTED: zinc-binding protein A33-like                |
| comp102593_c16 | 0            | 15.14        | -33.44839171 | 2.48E-13 | transcript antisense to ribosomal RNA protein           |
| comp102514_c1  | 0            | 5.67         | -33.50739032 | 1.68E-13 | Uncharacterized protein                                 |
| comp99321_c0   | 0            | 4.59         | -33.59238863 | 9.79E-14 | V-fos FBJ murine osteosarcoma viral oncogene homolog    |
| comp99121_c0   | 0            | 15.98        | -33.7482935  | 3.50E-14 | Cytochrome c oxidase III, mitochondria                  |
| comp102592_c0  | 0            | 2.32         | -33.77202381 | 2.93E-14 | G protein-coupled receptor 56 precursor                 |
| comp102167_c10 | 0            | 4.32         | -34.00881024 | 6.16E-15 | novel protein similar to vertebrate gliacolin (C1Q)     |
| comp101302_c1  | 0            | 20.44        | -34.05145602 | 4.59E-15 | cytochrome oxidase subunit I (mitochondrion)            |
| comp102901_c1  | 0            | 3.82         | -34.13215621 | 2.67E-15 | PREDICTED: Hypothetical protein LOC100004401            |
| comp99594_c0   | 0            | 4.24         | -34.13548634 | 2.61E-15 | phosphatidylinositide phosphatase SAC1-B                |
| comp101702_c0  | 0            | 20.99        | -34.19516048 | 1.78E-15 | Ependymin                                               |
| comp97193_c3   | 0            | 6.41         | -34.43074233 | 3.66E-16 | acyl-CoA-binding domain-containing protein 5A           |
| comp102884_c12 | 0            | 7.05         | -34.52532389 | 1.94E-16 | E3 ubiquitin-protein ligase LRSAM1                      |
| comp102221_c5  | 0            | 5.19         | -34.5539225  | 1.57E-16 | G protein-coupled receptor 161                          |
| comp102354_c4  | 0            | 14.11        | -34.77152155 | 3.65E-17 | DDB1- and CUL4-associated factor 13                     |
| comp70508_c0   | 0            | 9.82         | -34.84278945 | 2.23E-17 | $\beta$ -centractin                                     |
| comp99354_c0   | 0            | 14.7         | -35.45492096 | 3.46E-19 | casein kinase 2 $\alpha$ 1                              |
| comp102644_c2  | 0            | 29.27        | -36.0859036  | 4.61E-21 | Golgi transport 1 homolog B                             |

**Table S2.** Primers used for qRT-PCR validation.

| Gene ID        | Gene Name      | Primers Sequences     |                       |
|----------------|----------------|-----------------------|-----------------------|
|                |                | Sense 5'–3'           | Anti-Sense 5'–3'      |
| comp103013_c11 | MCL1b          | TCACACGGTTCTACTGTGTG  | CATCATGTTCCGATCCTTCC  |
| comp102279_c14 | PPM1K          | TCAGCTATCGCAGATGACCG  | GTGAAGATGCCTGGCTAACG  |
| comp102791_c0  | C4             | AGGCACTGAACAGCAGATAG  | TGCTTCCTCTAGATTGCCAC  |
| comp102564_c2  | STAT6          | TTCAGAACTGCCGACAAACG  | GAAGAAGCTGCAAACGCTTC  |
| comp93418_c0   | YAF2           | GGAAGTGACAGTGGGAGATC  | GTGAGACTCTCCGTTGAGTG  |
| comp101330_c3  | SDR16C5        | TGAAGCGTGAGGTTGGTGAC  | GATGAGTCCAGCAGAACTCG  |
| comp102898_c4  | MCM5           | GGTCGTGATGGTCTTTGATG  | GAGCAGCAGACCATCTCTAT  |
| comp89409_c2   | Park2          | AGAACGGTGGCTGTATGCAC  | CCCATTGGTTCCATTCCCTG  |
| comp102628_c2  | Hap70          | AAGAGAACCCTCTCCTCCAG  | GCTTTCTCCACAGGCTCAAG  |
| comp102986_c4  | Cyp2p9         | GGTGAAGAGAAAGTGAAGCGC | GATCACTTCCTGGATGCTGAG |
| comp102087_c6  | Soes3b         | ATGAGGCAGCTGGTCCCGTT  | GGAGACCTCTTCGAAGGTCC  |
| comp102484_c6  | CETP           | GACATCTCTGTGACCTCTTC  | CATTAAGGAGTCAAGGAGCG  |
| comp60482_c0   | IGF            | GTCAGCCACCTCAGTTTCCT  | TCCAGTGTGAACGCTAACGC  |
| comp102814_c2  | ASPDH          | AGTGGAGGTGTGTCATCCAC  | CCACCCATAATGCACCACT   |
| comp101847_c9  | Cyp2k6         | TTGACACAACCTCAGCCTGTG | TAAGCTCGTCTGACCATGTG  |
| comp102544_c0  | PIK3           | AACCAGGGATGTGTGCTGGT  | TCAGGGACAGCAGCAAACCT  |
| comp99124_c0   | Adm2a          | AACATGAGGCTCTCCCTGTG  | GGCGCTAATCTGCTCAAAGG  |
| comp102572_c6  | C3c            | AATCCTTGACACCACCCGC   | CGAGCAGCACATGGCTGATT  |
| comp98419_c0   | Cytb           | GGGAGAACAGTGCTAGTAGT  | AACCATCATCCACCTGCTGT  |
| comp102860_c0  | IL13RA1        | GGCTTGTGAGGCACATTGTT  | ATCTCTTCCACCACAGAGT   |
| Reference      | $\beta$ -actin | TGCAAAGCCGGATTTCGCTGG | AGTTGGTGACAATACCGTGC  |
